# Supplementary material for: Virus-Like Particles Containing the Tetrameric Ectodomain of Influenza Matrix Protein 2 and Flagellin Induce Heterosubtypic Protection in Mice
Source: Hindawi journal article supplement (doi:10.1155/2013/686549), 2013-01-01
Supplement: f1 [file 686549.f1.pdf]

Table 5.

| Groups   | P value (IgG) (M2e coating )(two tailed t-test) |
|----------|-------------------------------------------------|
| G2 vs G3 | 0.0133                                          |
| G2 vs G4 | 0.0033                                          |
| G2 vs G5 | 0.8174                                          |

Table 6.

| Groups   | P value (IgG1) (M2e coating )(two tailed t-test) |
|----------|--------------------------------------------------|
| G2 vs G3 | 0.0179                                           |
| G2 vs G4 | 0.0296                                           |
| G2 vs G5 | 0.5995                                           |

Table 7.

| Groups   | P value (IgG2a) (M2e coating )(two tailed t-test) |
|----------|---------------------------------------------------|
| G2 vs G3 | 0.0127                                            |
| G2 vs G4 | 0.0034                                            |
| G2 vs G5 | 0.6732                                            |

Table 8.

| Groups   | P value (IgG2a) (M2 coating )(two tailed t-test) |
|----------|--------------------------------------------------|
| G2 vs G3 | 0.0123                                           |
| G2 vs G4 | 0.0021                                           |
| G2 vs G5 | 0.5490                                           |
